# Supplementary material for: Europium based coordination polyelectrolytes enable core–shell–corona micelles as luminescent probes
Source: Royal Society of Chemistry journal article supplement (doi:10.1039/d0sm00598c), 2020-01-01
Supplement: d0sm00598c1.pdf [file d0sm00598c1.pdf]

## Europium based coordination polyelectrolytes enable core-shell-corona micelle as luminescent probe

Cheng Wei, Peng Ding, Xiran Nie, Martien A. Cohen Stuart and Junyou Wang\*

*State-Key Laboratory of Chemical Engineering, and Shanghai Key Laboratory of Multiphase  
Materials Chemical Engineering, East China University of Science and Technology, Shanghai  
200237, People's Republic of China*

\*To whom correspondence should be addressed:

E-mail: [junyouwang@ecust.edu.cn](mailto:junyouwang@ecust.edu.cn)

This file includes:

1. Luminescence measurements
2. Figure S1: Life time measurements of Eu-L<sub>2</sub>EO<sub>4</sub> loaded in CSC micelles with different Cu<sup>2+</sup> and S<sup>2-</sup> concentration
3. Table S1: Photophysical properties of the Eu-L<sub>2</sub>EO<sub>4</sub> loaded in CSC micelles with different Cu<sup>2+</sup> and S<sup>2-</sup> concentration

## Luminescence measurements

Lifetime of the Eu-L<sub>2</sub>EO<sub>4</sub> loaded in CSC micelles was measured with an Agilent Cary Eclipse spectrophotometer. Solution was put in 1.0 cm quartz cells and the excitation was set at 277 nm. The photophysical properties of the Eu-L<sub>2</sub>EO<sub>4</sub> loaded CSC micelles, including the 4f-4f emission quantum yield ( $\Phi_{\text{In}}$ ), the radiative lifetime ( $\tau_{\text{rad}}$ ), the radiative constant ( $k_{\text{r}}$ ), and the nonradiative constant ( $k_{\text{nr}}$ ), were estimated from the observed lifetimes ( $\tau_{\text{obs}}$ ) and emission spectra using the following equations<sup>1-3</sup>:

$$\Phi_{\text{In}} = \frac{k_{\text{r}}}{k_{\text{r}} + k_{\text{nr}}} = \frac{\tau_{\text{obs}}}{\tau_{\text{rad}}} \quad (1)$$

$$\frac{1}{\tau_{\text{rad}}} = A_{\text{MD},0} n^3 \left( \frac{I_{\text{tot}}}{I_{\text{MD}}} \right) \quad (2)$$

$$k_{\text{r}} = \frac{1}{\tau_{\text{rad}}} \quad (3)$$

$$k_{\text{nr}} = \frac{1}{\tau_{\text{obs}}} - \frac{1}{\tau_{\text{rad}}} \quad (4)$$

Where  $A_{\text{MD},0}$  is the spontaneous emission probability for the <sup>5</sup>D<sub>0</sub>-<sup>7</sup>F<sub>1</sub> transition in vacuum (14.65 s<sup>-1</sup>),  $n$  is the refractive index of the medium (1.5). Values are obtained from previous study which investigated the Eu-L<sub>2</sub>EO<sub>4</sub> coordination structures loaded in similar coacervate complexes<sup>1</sup>. ( $I_{\text{tot}}/I_{\text{MD}}$ ) is the ratio of the total area of the three peaks located at 592, 615 and 694 nm in the emission spectra to the area of the peak at 592 nm.

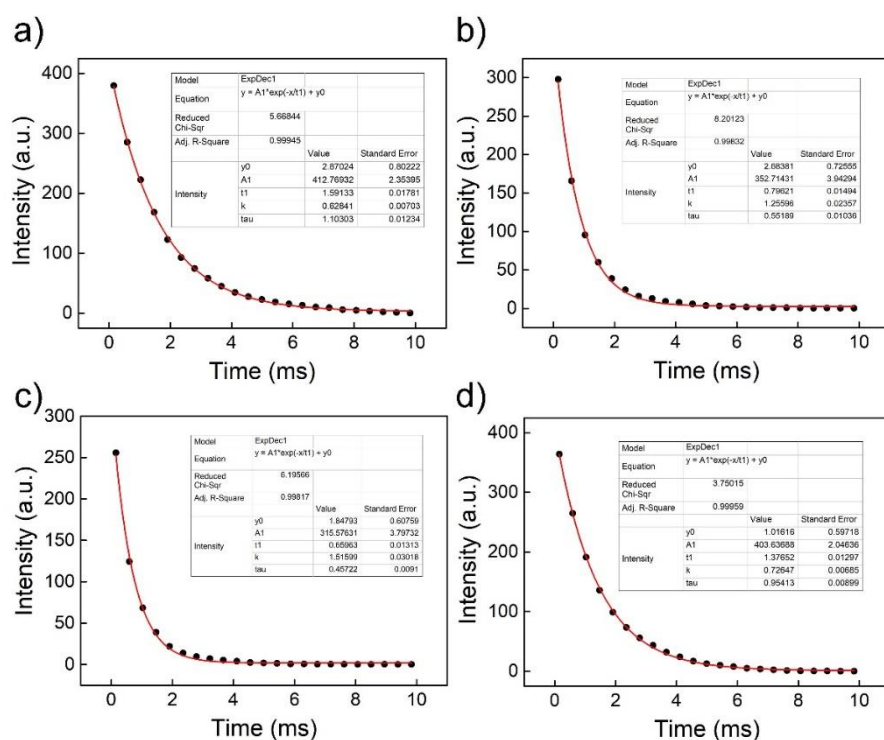

**Figure S1.** a, b: Life time measurements of Eu-L<sub>2</sub>EO<sub>4</sub> loaded in CSC micelles with the concentration of Cu<sup>2+</sup> at 0 μM (a) and 10 μM (b). c, d: Life time measurements of copper quenched Eu-L<sub>2</sub>EO<sub>4</sub> loaded CSC micelles with the concentration of S<sup>2-</sup> at 30 μM (c) and 80 μM (d). All the tests are performed in 10 mM Tris-HCl buffer at pH 7.0, at a fixed Eu<sup>3+</sup> concentration of 10 μM.

**Table S1.** Photophysical properties of the Eu-L<sub>2</sub>EO<sub>4</sub> loaded in CSC micelles at different Cu<sup>2+</sup> and S<sup>2-</sup> concentration

| Ion concentration                              | $\tau_{\text{rad}}/\text{ms}$ | $\tau_{\text{obs}}/\text{ms}$ | $k_{\text{r}}/\text{s}^{-1}$ | $k_{\text{nr}}/\text{s}^{-1}$ | $\Phi_{\text{In}}$ |
|------------------------------------------------|-------------------------------|-------------------------------|------------------------------|-------------------------------|--------------------|
| 0 μM Cu <sup>2+</sup>                          | 3.88                          | 1.59                          | $2.6 \times 10^2$            | $3.7 \times 10^2$             | 0.41               |
| 10 μM Cu <sup>2+</sup>                         | 4.04                          | 0.79                          | $2.5 \times 10^2$            | $1.0 \times 10^3$             | 0.20               |
| <sup>a</sup> 30 μM Cu <sup>2+</sup>            | /                             | /                             | /                            | /                             | /                  |
| 30 μM Cu <sup>2+</sup> + 30 μM S <sup>2-</sup> | 4.09                          | 0.65                          | $2.4 \times 10^2$            | $1.2 \times 10^3$             | 0.16               |
| 30 μM Cu <sup>2+</sup> + 80 μM S <sup>2-</sup> | 3.87                          | 1.37                          | $2.6 \times 10^2$            | $4.7 \times 10^2$             | 0.35               |

<sup>a</sup> The Luminescence intensity was too low to measure the life time of the Eu-L<sub>2</sub>EO<sub>4</sub>.

**Reference:**

1. Xu, L.; Xie, M.; Huang, J. and Yan, Y., *Langmuir* 2016, **32**, 5830-7.
2. Moreau, P.; Colette-Maatouk, S.; Vitorge, P.; Gareil, P. and Reiller, P. E., *Inorg. Chim. Acta* 2015, **432**, 81-88.
3. Marmodée, B.; de Klerk, J.; Kumke, M. U.; Ariese, F. and Gooijer, C., *J. Alloys Compd.* 2008, **451**, 361-364.
